# Supplementary material for: Distinct anion sensing by a 2D self-assembled Cu(ι)-based metal–organic polymer with versatile visual colorimetric responses and efficient selective separations via anion exchange
Source: Royal Society of Chemistry journal article supplement (doi:10.1039/c3ta01580g), 2013-01-01
Supplement: c3ta01580g.pdf [file c3ta01580g.pdf]

## Supplementary information for

# Distinct anion sensing by a 2D self-assembled Cu(I)-based metal-organic polymer with versatile visual colorimetric responses and efficient selective separations *via* anion exchange

Songyan Bai,<sup>[a,b]</sup> Tianlu Sheng,<sup>[b]</sup> Chunhong Tan,<sup>[a,b]</sup> Qilong Zhu,<sup>[a,b]</sup> Yihui Huang,<sup>[a,b]</sup>  
Hao Jiang,<sup>[a,b]</sup> Shengmin Hu,<sup>[b]</sup> Ruibiao Fu,<sup>[b]</sup> and Xintao Wu<sup>\*,[b]</sup>

<sup>a</sup>*State Key Laboratory of Structure Chemistry, Fujian Institute of Research on the Structure of Matter, Chinese Academy of Sciences, Fuzhou, 350002, China.*

<sup>b</sup>*Graduate School of the Chinese Academy of Sciences, Beijing, 100049, China.*

● Corresponding author:

E-mail: wxt@fjirsm.ac.cn.

Tel: +86-591-83719238; Fax: +86-591-83719238

## Materials and Methods:

All reagents and solvents used were received from commercial suppliers without further purification. Elemental analyses (C, H, and N) were performed with a Vario MICRO CHNOS Elemental Analyzer and Energy Dispersive X-ray Spectroscopy (EDX) analyses were conducted on a Scanning Electron Microscope of JSM-6700F. The infrared spectra with KBr pellet were recorded in the range of 4000-400  $\text{cm}^{-1}$  on a Perkin-Elmer Spectrum One FT-IR Spectrometer. Thermal analysis was performed on a NETZSCH STA 449C instrument from room temperature to 800  $^{\circ}\text{C}$  with a heating rate of 10  $^{\circ}\text{C}/\text{min}^{-1}$  under nitrogen flow. The UV/Vis spectra were carried out on a PE Lambda 800 UV/Vis/NIR spectrometer equipped with an integrating sphere, and the  $\text{BaSO}_4$  plate was used as the reference. The EPR spectra were acquired on a Bruker ER-420 spectrometer with a 100 KHz magnetic field in X band and an electronic field of 9655.448 MHz at room temperature. Powder X-ray diffraction (PXRD) data were collected on a DMAX-2500 diffractometer with  $\text{Cu K}\alpha$ .

## Synthesis:

### $\alpha,\alpha'$ -bis(N-glutamyl)-p-xylene ( $\text{bgxH}_4$ ).

L-Glutamic acid (7.36 g, 0.05 mol) and sodium hydroxide (4.0 g, 0.1 mol) were dissolved in the solution of 30 ml methanol and 30 ml water. A solution of terephthalaldehyde (3.35 g, 0.025 mol) in 60 mL of methanol was added and the mixed solution was stirred at room temperature for 3 hours. Whilst it was cooled to 0  $^{\circ}\text{C}$ , the solution of sodium borohydride (2.27 g, 0.06 mol) in 40 ml methanol was slowly added into the mixture, and stirring was continued for one more hour. Then, the solution was adjusted to pH 3.0~4.0 by dropwise addition of concentrated hydrochloric acid. After filtration, the white solid was then washed twice with dry ethanol and ether, recrystallized and dried under vacuum at ambient temperature to give 70% yield.  $^1\text{H}$  NMR (400MHz,  $\text{D}_2\text{O}$ ):  $\delta$  1.80 (m, 4H); 2.30 (t,  $J=1.37\text{Hz}$ , 4H); 3.0 (t,  $J=1.37\text{Hz}$ , 2H); 4.52 (d,  $J=1.37\text{Hz}$ , 2H); 4.82 (d,  $J=1.37\text{Hz}$ , 2H); 7.42 ppm (s, 4H); ESI-MS:  $m/z$  395.2 ( $[\text{M}-1]^+$ , calcd 396.4), elemental analysis calcd (%) for  $\text{C}_{18}\text{H}_{24}\text{N}_2\text{O}_8$ : C 54.54, H 6.10, N 7.07; found: C 54.41, H 6.19, N 6.98.

During the solvothermal process,  $\text{Cu(II)}$  ions have been transformed to  $\text{Cu(I)}$  cations, whilst  $\alpha,\alpha'$ -bis(N-pyroglutamyl)-p-xylene ( $\text{bpgxH}_2$ ) forms in situ reaction from intramolecular cyclization of  $\text{bgxH}_4$ .

**$[\text{Cu}_4(\text{bipy})_4(\text{L-bgxH}_2)](\text{NO}_3)_2 (\text{H}_2\text{O})_4$  (compound 1).** Copper nitrate trihydrate (0.0377 g, 0.2 mmol) and 4,4'-bipyridine (0.0312 g, 0.2 mmol) were added to the solution of  $\text{bgxH}_4$  (0.0396 g, 0.1 mmol) in 5 ml DMF/ethanol/water (v:v:v=1:1:1). The reaction suspension was stirred for 10 min and was transferred into a 12 ml vessel. The vessel was sealed and heated at 105  $^{\circ}\text{C}$  for 1 day and slowly cooled to the room temperature. After using ultrasonic treatments for 10 minutes and rinsing thoroughly with distilled water and dry ethanol, the red prism crystals of compound **1** were obtained in ca. 58% yield based on  $\text{bgxH}_2$ . Anal. Calcd for  $\text{Cu}_4\text{C}_{58}\text{H}_{58}\text{N}_{12}\text{O}_{16}$  (**1**):  $M=1432.34$ ; elemental analysis: calcd (%) for  $\text{Cu}_4\text{N}_{12}\text{O}_{16}\text{C}_{58}\text{H}_{57}$ : C 48.64, H 4.01, N 11.73; found: C 48.55, H 4.14, N 11.58.

Crystallographic Analyses:

The structural determination of single crystal was performed on Rigaku Mercury CCD diffractometer with graphite-monochromated Mo K $\alpha$  ( $\lambda = 0.71073 \text{ \AA}$ ) radiation at room temperature. The structures were solved by direct methods and refined by the full-matrix least-squares technique on  $F^2$  using the SHELXTL-97 program. All non-hydrogen atoms were refined with anisotropic displacement parameters. The positions of hydrogen atoms attached to carbon atoms were generated geometrically (C-H bond fixed at  $0.97 \text{ \AA}$ ). Notably, the water molecules in the two complexes were refined by using the pseudo-isotropic “ISOR” restraint to make the ADP values of the disordered oxygen atoms more reasonable. And the selected bond lengths and angles of the complexes are listed in Table S1-S2.

Tablet S1. Crystal Data and Structure Refinements for compound **1**

|                                                                                                                                                       |                                                                                 |
|-------------------------------------------------------------------------------------------------------------------------------------------------------|---------------------------------------------------------------------------------|
| Compound                                                                                                                                              | <b>1</b>                                                                        |
| Formula                                                                                                                                               | Cu <sub>4</sub> C <sub>58</sub> H <sub>58</sub> N <sub>12</sub> O <sub>16</sub> |
| FW                                                                                                                                                    | 1431.31                                                                         |
| Temperature                                                                                                                                           | 293K                                                                            |
| Cryst syst m                                                                                                                                          | triclinic                                                                       |
| Space group                                                                                                                                           | <i>P</i> 1                                                                      |
| <i>a</i> (Å)                                                                                                                                          | 9.1100(3)                                                                       |
| <i>b</i> (Å)                                                                                                                                          | 10.3806(7)                                                                      |
| <i>c</i> (Å)                                                                                                                                          | 16.1429(10)                                                                     |
| $\alpha$ (deg)                                                                                                                                        | 82.065(13)                                                                      |
| $\beta$ (deg)                                                                                                                                         | 77.497(9)                                                                       |
| $\gamma$ (deg)                                                                                                                                        | 82.299(13)                                                                      |
| <i>V</i> (Å <sup>3</sup> )                                                                                                                            | 1467.53(14)                                                                     |
| <i>Z</i>                                                                                                                                              | 1                                                                               |
| <i>D</i> <sub>c</sub> (g cm <sup>-3</sup> )                                                                                                           | 1.61945                                                                         |
| $\mu$ (mm <sup>-1</sup> )                                                                                                                             | 1.511                                                                           |
| Reflns colld                                                                                                                                          | 16907                                                                           |
| Unique reflns ( <i>R</i> <sub>int</sub> )                                                                                                             | 12212                                                                           |
| GOF                                                                                                                                                   | 1.032                                                                           |
| <i>R</i> 1, <sup>a</sup> <i>wR</i> 2 <sup>b</sup> [ <i>I</i> >2 $\sigma$ ( <i>I</i> )]                                                                | 0.0378, 0.0915                                                                  |
| <i>R</i> 1, <sup>a</sup> <i>wR</i> 2 <sup>b</sup> (all data)                                                                                          | 0.0463, 0.0969                                                                  |
| <sup>a</sup> <i>R</i> 1 = $\sum( F_o  -  F_c ) / \sum  F_o $ . <sup>b</sup> <i>wR</i> 2 = $\{\sum w [(F_o^2 - F_c^2)] / \sum w [(F_o^2)^2]\}^{0.5}$ . |                                                                                 |

Tablet S2. Selected Bond Lengths [Å] and Angles [°] for compound **1**

|             |            |              |            |             |            |
|-------------|------------|--------------|------------|-------------|------------|
| Cu1-N3      | 1.938(3)   | Cu1-N5       | 1.935(4)   | Cu1-O1      | 2.189(3)   |
| Cu2-N7      | 1.909(3)   | Cu2-N9       | 1.915(3)   | Cu2-O1      | 2.251(3)   |
| Cu3-N4      | 1.921(3)   | Cu3-N6a      | 1.929(3)   | Cu3-O5b     | 2.330(4)   |
| Cu4-N10a    | 1.913(4)   | Cu4-N8       | 1.924(3)   | Cu4-O4b     | 2.138(3)   |
| N6-Cu3c     | 1.929(3)   | N10-Cu4c     | 1.913(4)   | O5-Cu3d     | 2.330(3)   |
| O4-Cu4d     | 2.138(3)   |              |            |             |            |
| N3-Cu1-N5   | 155.98(14) | N3-Cu1-O1    | 98.81(13)  | N5-Cu1-O1   | 105.02(13) |
| N7-Cu2-N9   | 157.96(14) | N7-Cu2-O1    | 99.27(12)  | N9-Cu2-O1   | 100.06(12) |
| N4-Cu3-N6a  | 156.20(14) | N4-Cu3-O5b   | 106.17(14) | N6a-Cu3-O5b | 97.12(14)  |
| N10a-Cu4-N8 | 160.29(14) | N10a-Cu4-O4b | 98.61(15)  | N8-Cu4-O4b  | 100.54(15) |

<sup>a</sup>Symmetry codes: a x-2,y,z+1; b x-1,y-1,z;c x+2,y,z-1;d x+1,y+1,z.

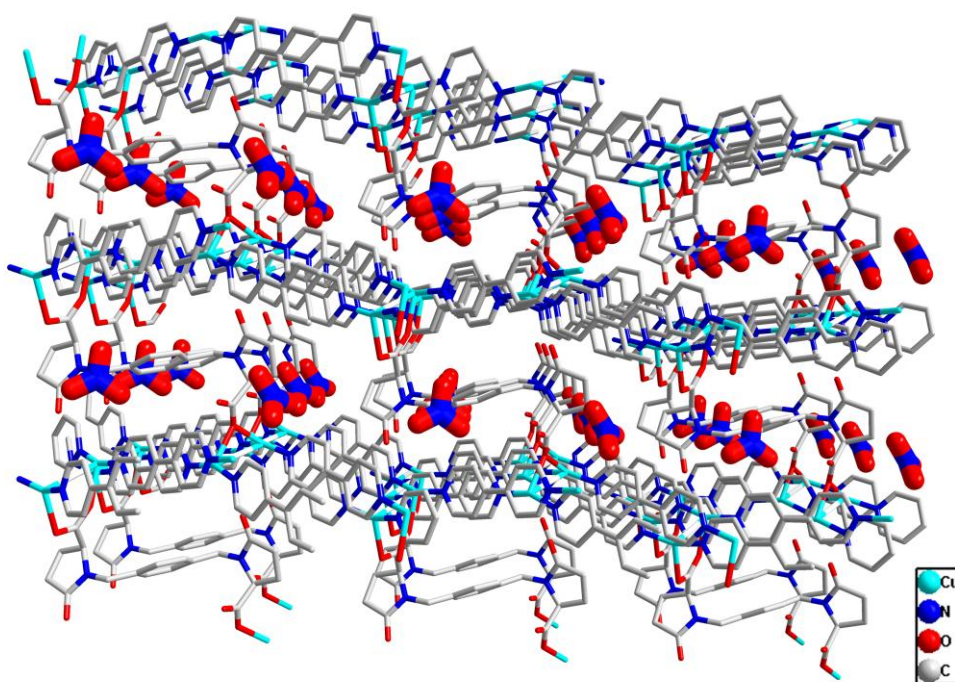

**Fig.S1.** The voids are occupied by uncoordinated nitrate anions in space filling representation.

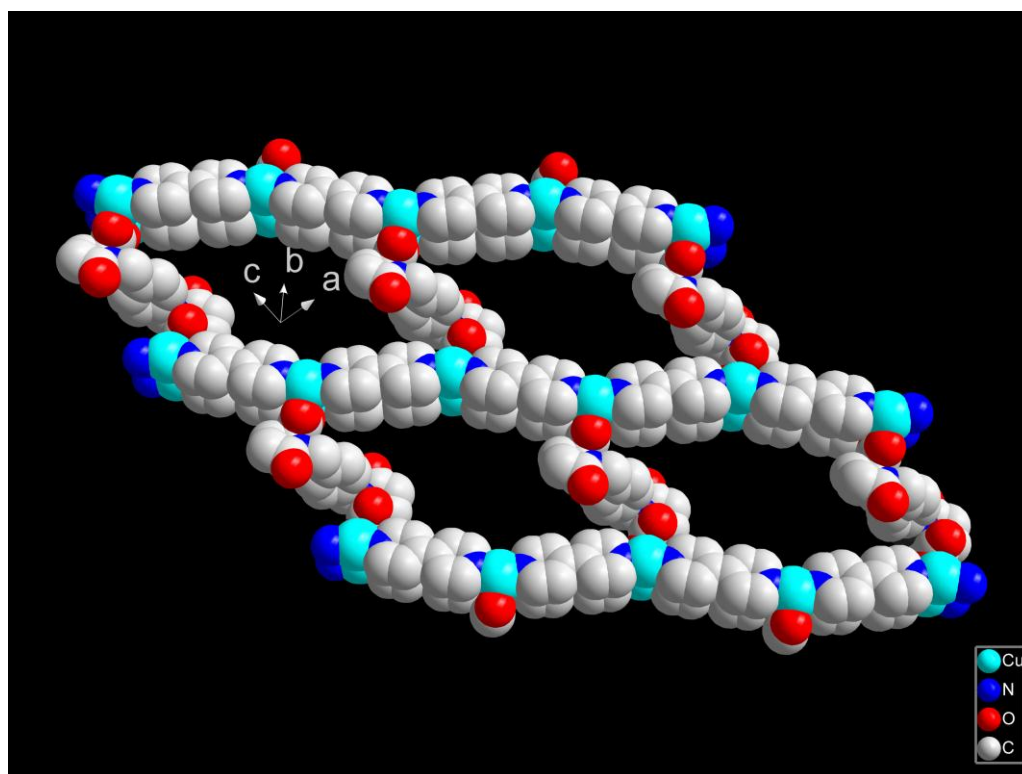

**Fig.S2.** Space-filling representation of single layer in compound **1** (The uncoordinated nitrate anions and water molecules are omitted.)

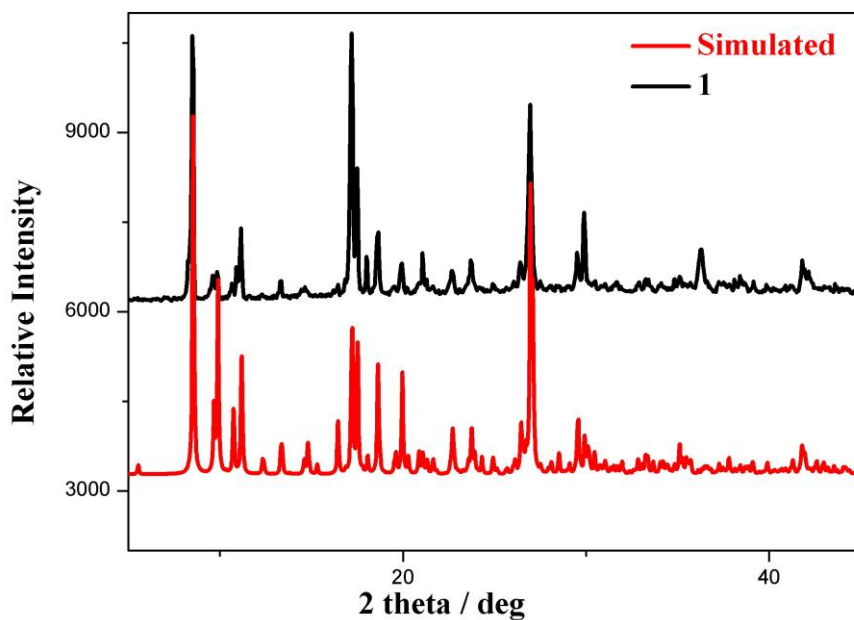

**Fig.S3.** Powder X-ray diffractions for simulated and experimental compound **1**

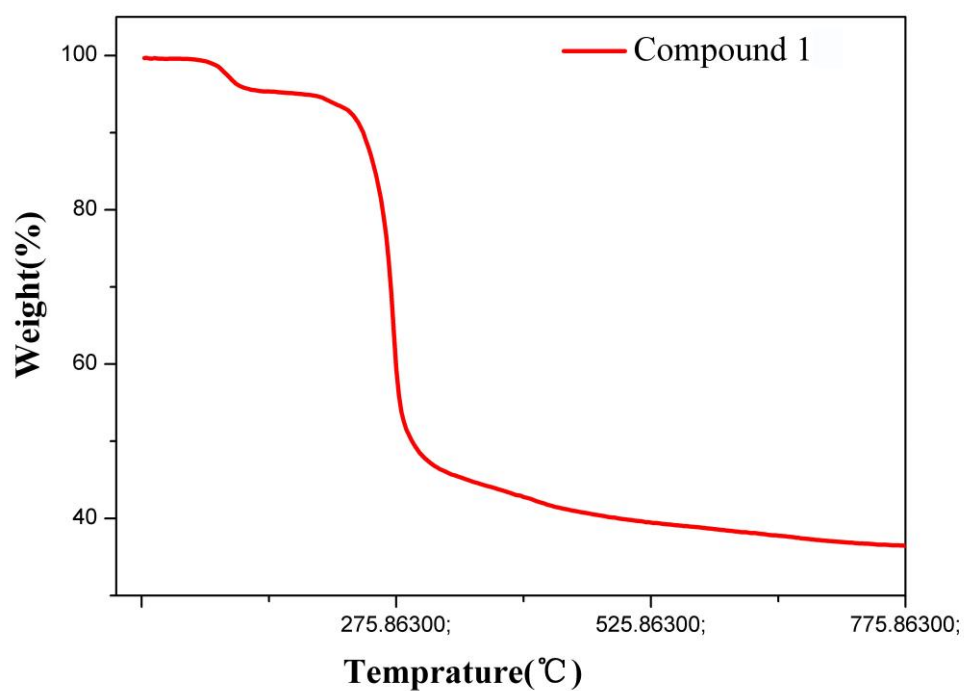

**Fig.S4.** TGA curve of compound 1.

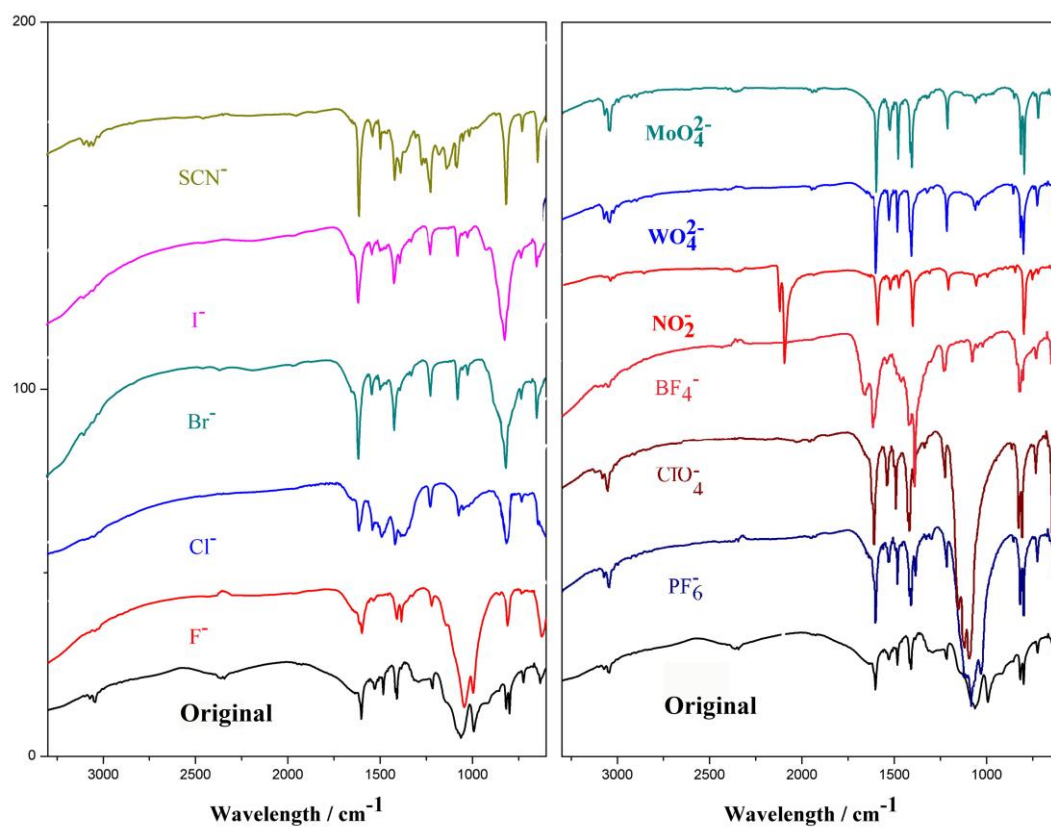

**Fig.S5.** IR spectra based on anion-exchanged products.



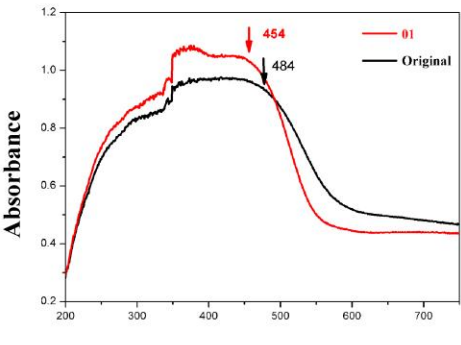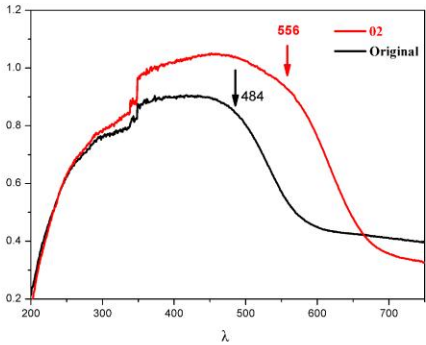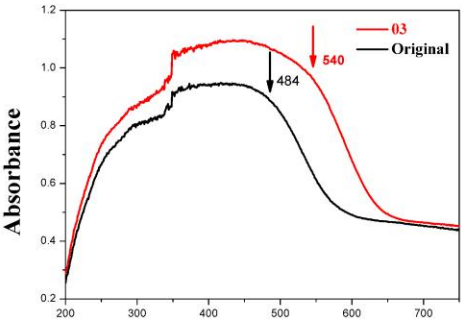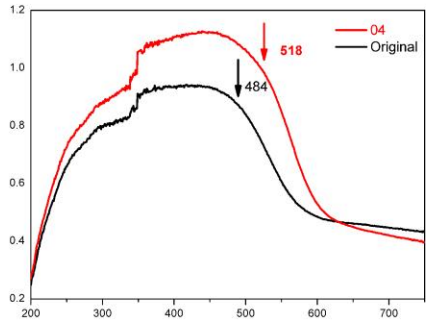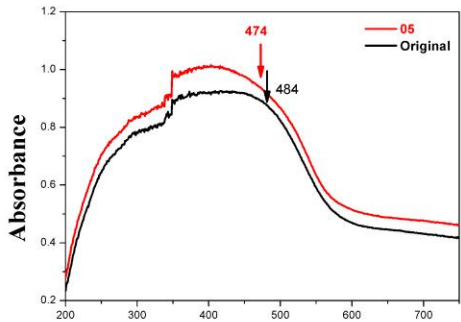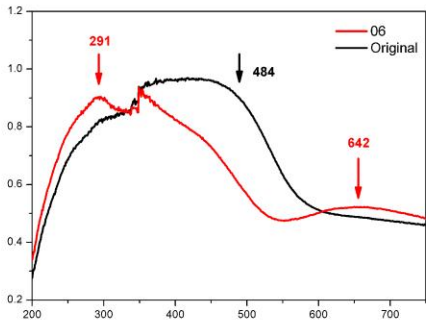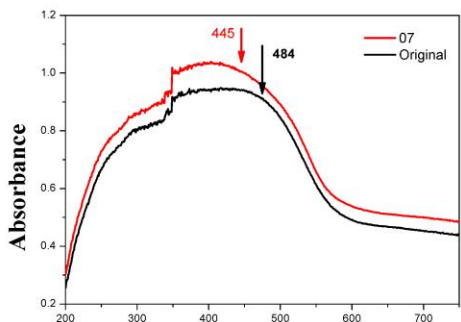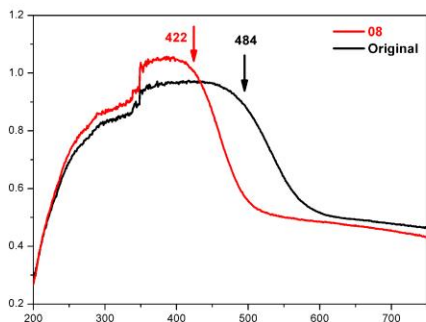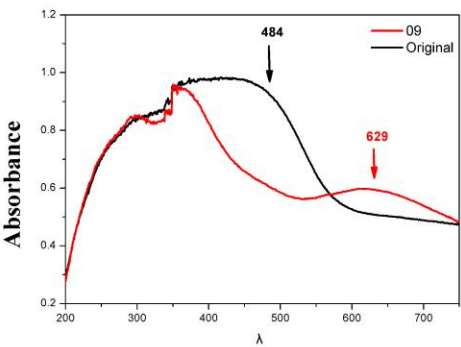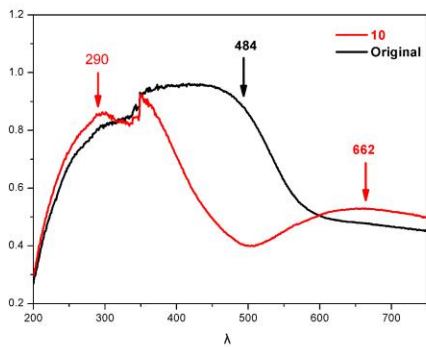

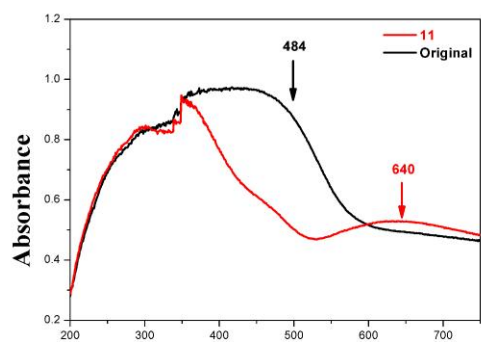

**Fig.S6:** Solid-state UV/Vis spectra based on anion-exchanged products

**Fig.S7:** EDX and Elemental Analyses

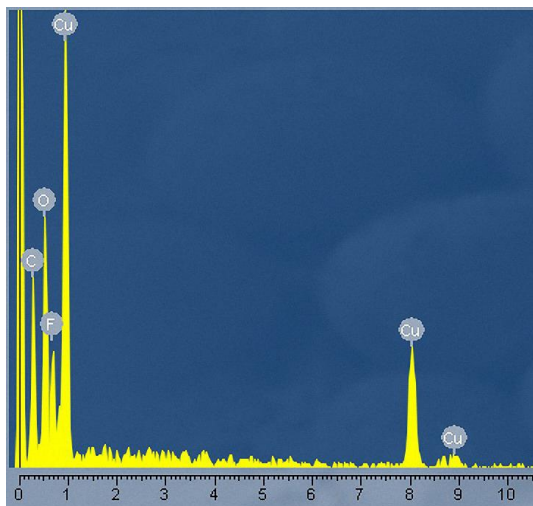

| Products of 01 |           |           |
|----------------|-----------|-----------|
| Element        | Calcd (%) | Found (%) |
| C              | 49.88     | 50.42     |
| H              | 4.19      | 4.65      |
| N              | 10.65     | 10.87     |

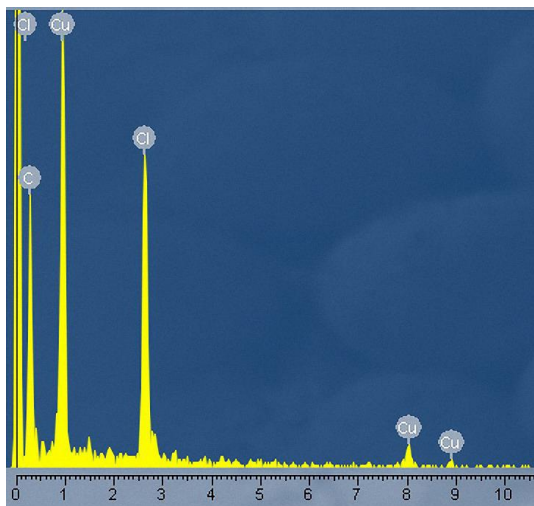

| Products of 02 |           |           |
|----------------|-----------|-----------|
| Element        | Calcd (%) | Found (%) |
| C              | 50.01     | 50.58     |
| H              | 4.20      | 4.54      |
| N              | 11.12     | 11.57     |



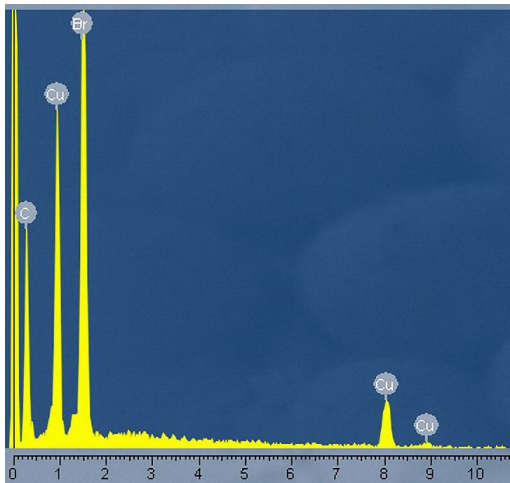

| Products of 03 |           |           |
|----------------|-----------|-----------|
| Element        | Calcd (%) | Found (%) |
| C              | 47.48     | 47.98     |
| H              | 3.98      | 4.60      |
| N              | 9.65      | 9.68      |

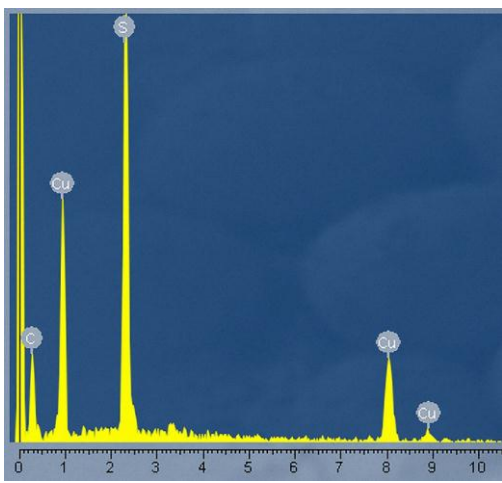

| Products of 05 |           |           |
|----------------|-----------|-----------|
| Element        | Calcd (%) | Found (%) |
| C              | 49.14     | 49.25     |
| H              | 4.08      | 4.79      |
| N              | 10.74     | 10.80     |

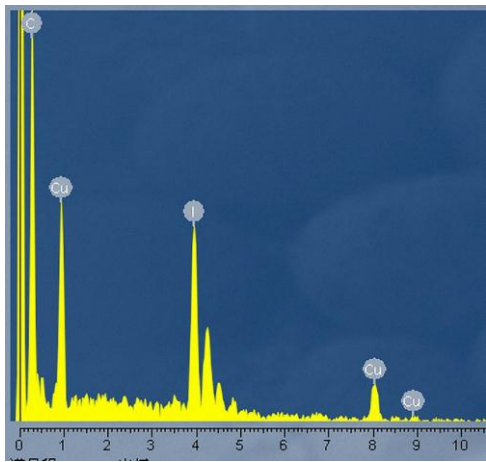

| Products of 04 |           |           |
|----------------|-----------|-----------|
| Element        | Calcd (%) | Found (%) |
| C              | 47.30     | 47.83     |
| H              | 3.97      | 4.33      |
| N              | 10.83     | 10.84     |

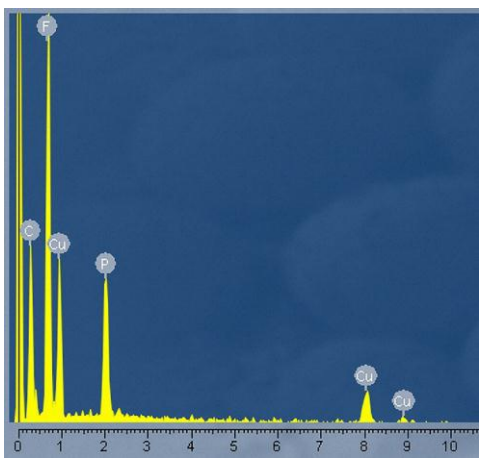

| Products of 06 |           |           |
|----------------|-----------|-----------|
| Element        | Calcd (%) | Found (%) |
| C              | 46.71     | 47.32     |
| H              | 3.92      | 4.63      |
| N              | 10.61     | 11.62     |

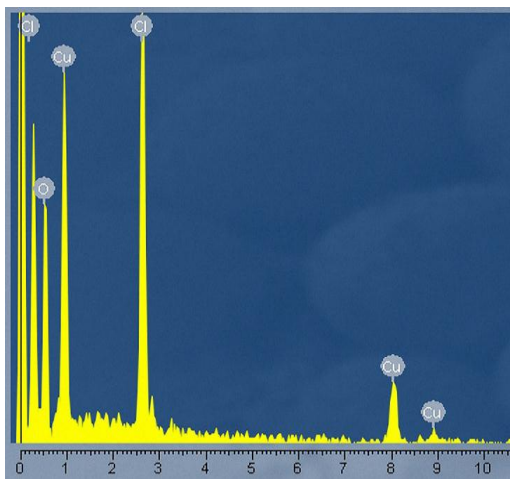

| Products of 07 |           |           |
|----------------|-----------|-----------|
| Element        | Calcd (%) | Found (%) |
| C              | 47.39     | 47.54     |
| H              | 3.98      | 4.06      |
| N              | 10.50     | 10.51     |

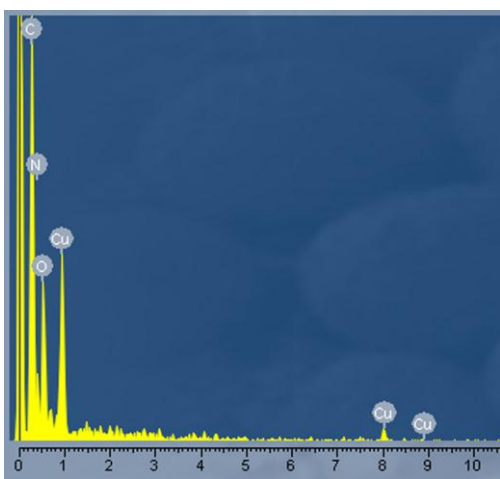

| Products of 09 |           |           |
|----------------|-----------|-----------|
| Element        | Calcd (%) | Found (%) |
| C              | 48.86     | 48.48     |
| H              | 4.10      | 4.27      |
| N              | 11.79     | 12.11     |

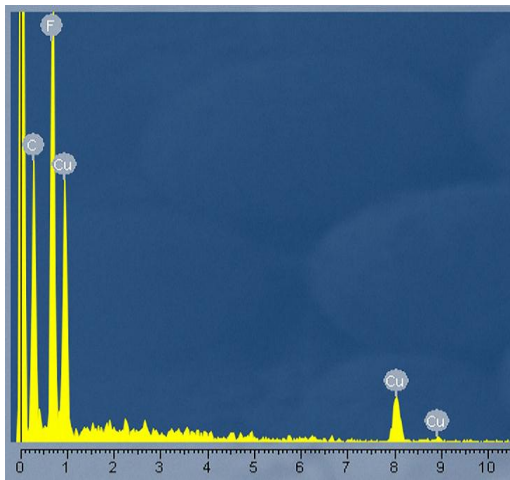

| Products of 08 |           |           |
|----------------|-----------|-----------|
| Element        | Calcd (%) | Found (%) |
| C              | 47.76     | 47.75     |
| H              | 4.00      | 3.37      |
| N              | 10.54     | 10.54     |

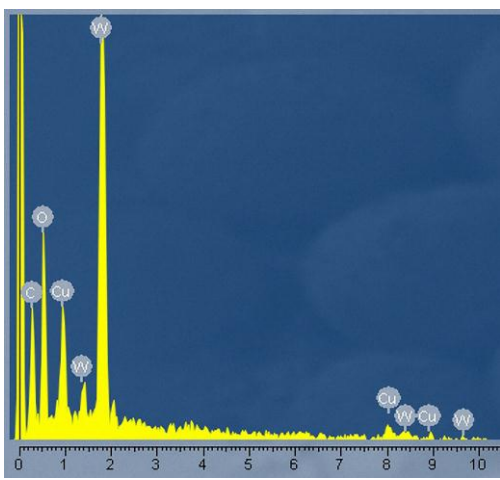

| Products of 10 |           |           |
|----------------|-----------|-----------|
| Element        | Calcd (%) | Found (%) |
| C              | 46.26     | 46.57     |
| H              | 3.88      | 4.19      |
| N              | 10.80     | 10.90     |

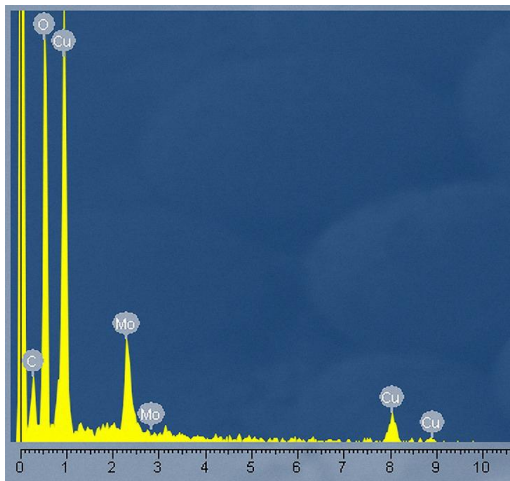

| Products of 11 |           |           |
|----------------|-----------|-----------|
| Element        | Calcd (%) | Found (%) |
| C              | 47.34     | 47.07     |
| H              | 3.97      | 3.71      |
| N              | 10.05     | 10.12     |

**Anion-exchange Selectivity:**

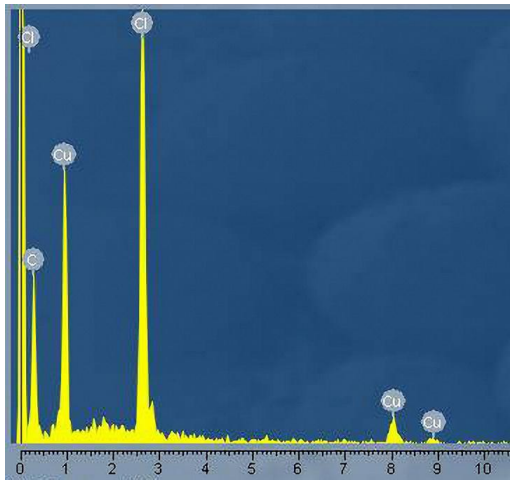

| Products of 01' |           |           |
|-----------------|-----------|-----------|
| Element         | Calcd (%) | Found (%) |
| C               | 49.33     | 48.84     |
| H               | 4.09      | 4.41      |
| N               | 11.15     | 10.42     |

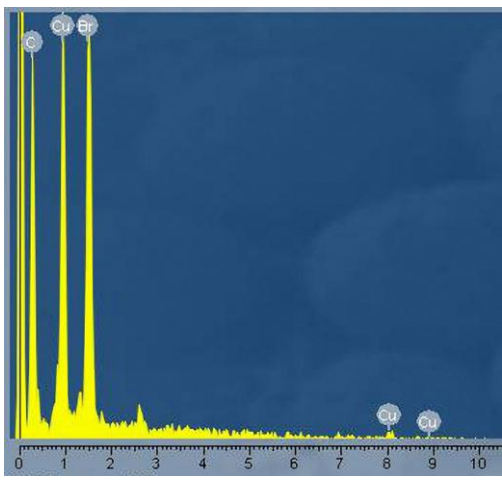

| Products of 02' |           |           |
|-----------------|-----------|-----------|
| Element         | Calcd (%) | Found (%) |
| C               | 47.97     | 48.42     |
| H               | 3.96      | 4.69      |
| N               | 10.50     | 11.35     |

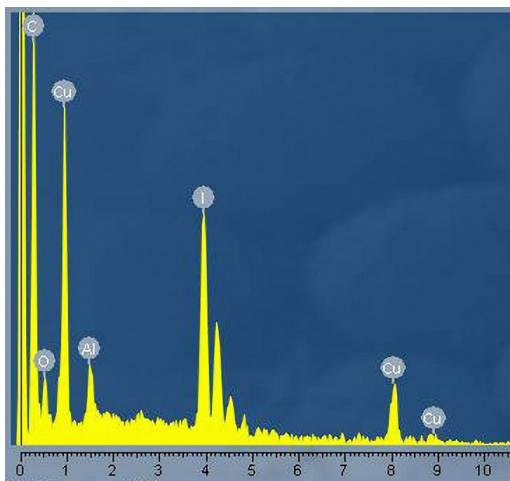

| Products of 03' |           |           |
|-----------------|-----------|-----------|
| Element         | Calcd (%) | Found (%) |
| C               | 47.72     | 48.39     |
| H               | 3.96      | 4.11      |
| N               | 11.11     | 10.38     |

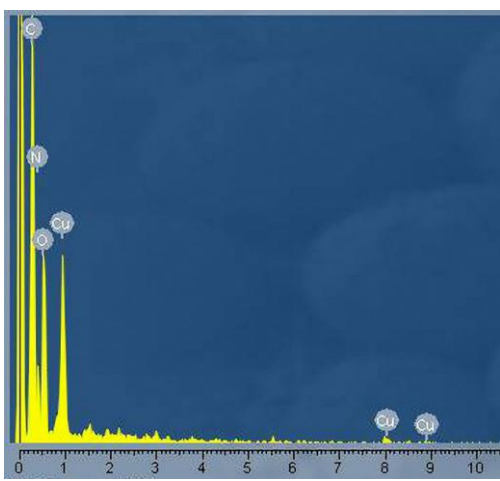

| Products of 05' |           |           |
|-----------------|-----------|-----------|
| Element         | Calcd (%) | Found (%) |
| C               | 49.15     | 48.80     |
| H               | 4.01      | 4.49      |
| N               | 11.75     | 11.58     |

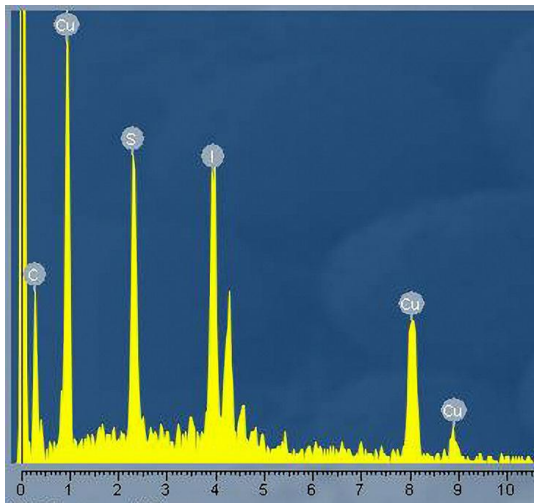

| Products of 04' |           |           |
|-----------------|-----------|-----------|
| Element         | Calcd (%) | Found (%) |
| C               | 48.45     | 47.88     |
| H               | 3.98      | 4.24      |
| N               | 11.43     | 11.36     |

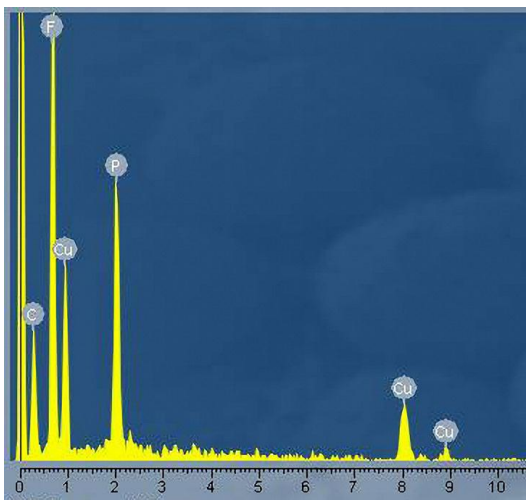

| Products of 06' |           |           |
|-----------------|-----------|-----------|
| Element         | Calcd (%) | Found (%) |
| C               | 46.98     | 47.27     |
| H               | 3.87      | 4.43      |
| N               | 10.76     | 10.82     |

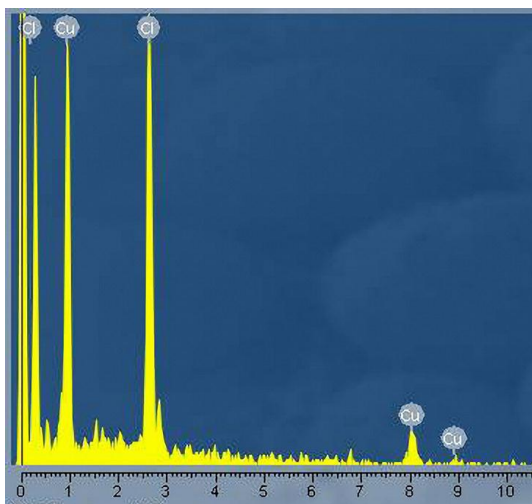

| Products of 07' |           |           |
|-----------------|-----------|-----------|
| Element         | Calcd (%) | Found (%) |
| C               | 49.52     | 49.86     |
| H               | 4.08      | 4.40      |
| N               | 10.99     | 11.32     |

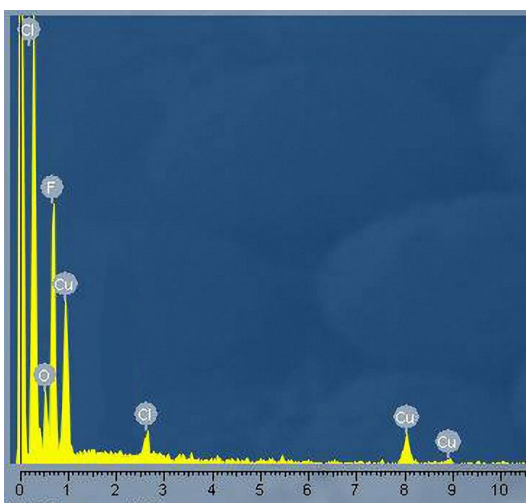

| Products of 09' |           |           |
|-----------------|-----------|-----------|
| Element         | Calcd (%) | Found (%) |
| C               | 48.12     | 48.58     |
| H               | 3.97      | 4.49      |
| N               | 11.15     | 10.87     |

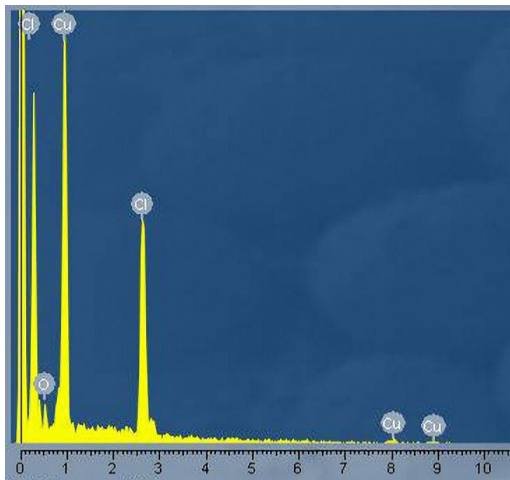

| Products of 08' |           |           |
|-----------------|-----------|-----------|
| Element         | Calcd (%) | Found (%) |
| C               | 49.43     | 50.16     |
| H               | 4.08      | 4.38      |
| N               | 11.06     | 11.09     |

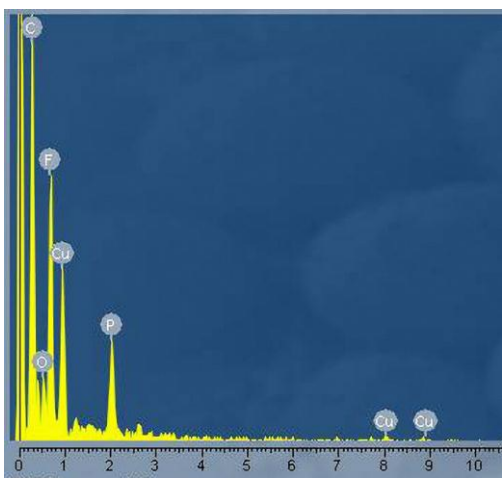

| Products of 10' |           |           |
|-----------------|-----------|-----------|
| Element         | Calcd (%) | Found (%) |
| C               | 46.98     | 47.39     |
| H               | 3.87      | 4.47      |
| N               | 10.76     | 11.25     |

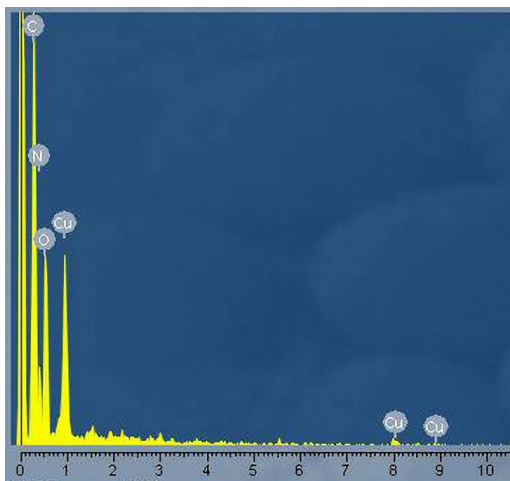

| Products of 11' |           |           |
|-----------------|-----------|-----------|
| Element         | Calcd (%) | Found (%) |
| C               | 48.88     | 48.17     |
| H               | 4.03      | 4.37      |
| N               | 11.80     | 11.25     |

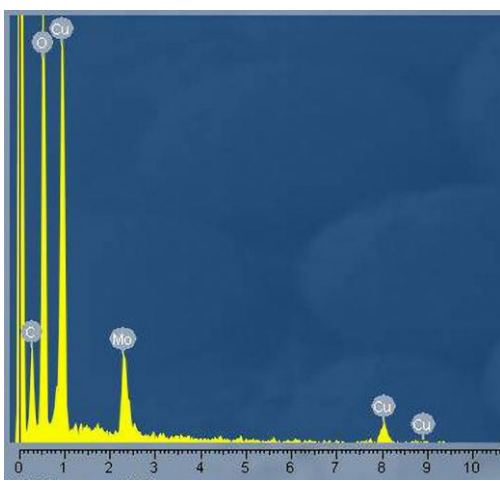

| Products of 13' |           |           |
|-----------------|-----------|-----------|
| Element         | Calcd (%) | Found (%) |
| C               | 47.67     | 48.25     |
| H               | 3.93      | 4.67      |
| N               | 11.05     | 11.53     |

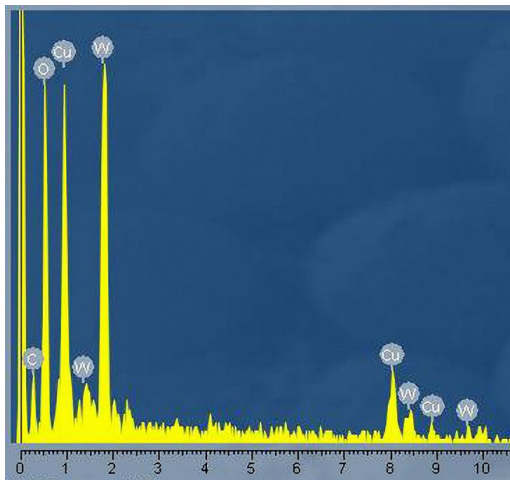

| Products of 12' |           |           |
|-----------------|-----------|-----------|
| Element         | Calcd (%) | Found (%) |
| C               | 47.66     | 46.89     |
| H               | 3.93      | 4.35      |
| N               | 11.05     | 11.59     |

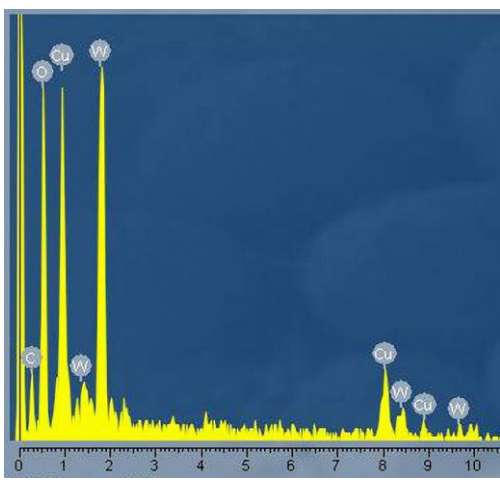

| Products of 14' |           |           |
|-----------------|-----------|-----------|
| Element         | Calcd (%) | Found (%) |
| C               | 47.63     | 47.69     |
| H               | 3.93      | 4.76      |
| N               | 11.03     | 11.79     |
